# Supplementary material for: The Genes of Freedom: Genome-Wide Insights into Marronage, Admixture and Ethnogenesis in the Gulf of Guinea
Source: Genes (Basel). 2021 May 28;12(6):833. doi: 10.3390/genes12060833 (PMC8229774; doi:10.3390/genes12060833)
Supplement: Supplementary file 1 [file genes-12-00833-s001.zip › Almeida_et_al2021_Supplementary_Tables.xlsx]

## Sheet: Table S1
Table S1. Geographical location, language affiliation and sample sizes of populations used in this study.
Population	Country	Population_ID	Language	Language Group	Sample Size	Latitude1	Longitude1	Reference
Angolares	São Tomé and Príncipe	ANG	Angolar (Lunga Ngola)	Gulf of Guinea Creole	9	0.2	6.6	This study
Forros	São Tomé and Príncipe	FOR	Forro (Lungwa Santome)	Gulf of Guinea Creole	8	0.3	6.7	This study
Principenses	São Tomé and Príncipe	PRI	Principense(Lung'Ie)	Gulf of Guinea Creole	7	1.6	7.4	This study
Bubi	Equatorial Guinea	BBS	Bubi	Bantu	12	3.8	8.8	Gelabert et al. 2019
Mandinka	Gambia	GWD	Mandinka	Mande	12	13.5	-16.5	1000 Genomes Project Consortium 2015
Mende	Sierra Leone	MSL	Mende	Mande	12	8.50	-13.00	1000 Genomes Project Consortium 2015
Esan	Nigeria	ESN	Esan	Edoid	12	9.00	7.50	1000 Genomes Project Consortium 2015
Yoruba	Nigeria	YRI	Yoruba	Defoid	12	8.00	5.00	1000 Genomes Project Consortium 2015
Ovimbundu	Angola	OVI	Umbundu	Bantu	5	-11.9	14.9	This study
Ganguela	Angola	GAN	Nyemba	Bantu	5	-14.9	19.1	This study
Nyaneka	Angola	NYK	Nyaneka	Bantu	5	-15.3	14.0	This study
Kuvale	Angola	KUV	Kuvale	Bantu	7	-15.8	13.0	This study
Himba	Angola	HIM	Himba	Bantu	6	-16.8	12.8	This study
CEU (Utah residents with Northern and Western European ancestry)	Europe (Centre d'Etude du Polymorphisme Humain)	CEU	English	Indo-European	12	55.00	-3.00	1000 Genomes Project Consortium 2015
Iberians	Spain	IBS	Spanish	Indo-European	11	40.00	- 3.50	1000 Genomes Project Consortium 2015
1 Average coordinates of individuals' provenance locations

## Sheet: Table S2
Table S2. Ancestry estimates based on ADMIXTURE and PCA
POP	IND	ADMIXTURE			PCA
		Europe	Gulf of Guinea	Angola	Europe	Gulf of Guinea	Angola
FOR	J515	0.05	0.57	0.38	0.06	0.65	0.29
	J534	0.41	0.44	0.15	0.41	0.41	0.19
	J550	0.18	0.37	0.46	0.18	0.46	0.36
	N107	0.01	0.80	0.19	0.01	0.74	0.24
	N114	0.07	0.55	0.38	0.07	0.55	0.38
	N218	0.12	0.52	0.36	0.11	0.49	0.40
	N717	0.03	0.44	0.54	0.03	0.55	0.42
	N274	0.17	0.69	0.14	0.17	0.76	0.07
	Average	0.13	0.55	0.33	0.13	0.58	0.29
PRI	PRIN102	0.03	0.68	0.30	0.03	0.76	0.21
	PRIN166	0.06	0.53	0.41	0.05	0.69	0.26
	PRIN181	0.03	0.74	0.23	0.03	0.70	0.27
	PRIN192	0.02	0.92	0.07	0.02	0.85	0.13
	PRIN197	0.02	0.63	0.35	0.01	0.61	0.38
	PRIN72	0.07	0.73	0.20	0.06	0.81	0.12
	PRIN93	0.02	0.57	0.41	0.02	0.72	0.26
	Average	0.03	0.68	0.28	0.68	0.73	0.23

## Sheet: Table S3
Table S3. MtDNA HVRI and HVRII variation data in the Principenses
Individual	HVR-I Haplotypes												Haplogroup	HVR-II Haplotypes
Prin184	16129	16148	16168T	16172	16187	16188A	16189	16223	16230	16311	16320		L0a1'4	93	185	189	200	236	247	263	315iC
Prin70	16129	16148	16168T	16172	16187	16188A	16189	16223	16230	16311	16320		L0a1'4	93	185	189	200	236	247	263	315iC
Prin94	16129	16148	16168T	16172	16187	16188G	16189	16223	16230	16311	16320		L0a1'4	93	152	185	189	200	236	247	263	315iC
Prin95	16148	16172	16187	16188G	16189	16223	16230	16311	16320				L0a2	93	152	189	204	207	236	247	263	315iC
Prin102	16126	16187	16189	16223	16264	16270	16278	16293	16311				L1b	152	182	185T	195	247	263	315iC	357
Prin201	16126	16187	16189	16223	16264	16270	16278	16293	16311				L1b	152	182	185T	195	247	263	315iC	357
Prin93	16126	16187	16189	16223	16264	16270	16278	16293	16311				L1b	152	182	185T	195	247	263	315iC	357
Prin166	16126	16187	16189	16223	16264	16270	16278	16311					L1b1a9	152	182	185T	189	195	247	263	315iC	357
Prin193	16129	16187	16189	16223	16261	16265C	16278	16286A	16292	16294	16311	16360	L1c	152	182	186A	189C	195	198	247	263	297	315iC	316
Prin27	16079	16086	16129	16187	16189	16223	16241	16278	16291	16294	16311	16360	L1c1b	152	182	186A	189C	195	198	247	263	297	315iC	316
Prin26	16129	16163	16187	16189	16209	16223	16278	16293	16294	16311	16360		L1c3b1a	151	152	182	186A	189C	247	263	315iC	316
Prin92	16129	16163	16187	16189	16209	16223	16278	16293	16294	16311	16360		L1c3b1a	151	152	182	186A	189C	247	263	315iC	316
Prin200	16223	16278	16294	16309									L2a1	146	152	195	263	309iCC	315iC
Prin72	16223	16278	16294	16309									L2a1	146	152	195	263	309iCC	315iC	408G
Prin104	16193	16213	16223	16239	16278	16294	16309						L2a1c2a	146	152	195	263	309C>TC	315iC
Prin161	16193	16213	16223	16239	16278	16294	16309						L2a1c2a	146	152	195	263	309C>TC	315iC
Prin216	16193	16213	16223	16239	16278	16294	16309						L2a1c2a	146	152	195	263	309C>TC	315iC
Prin74	16193	16213	16223	16239	16278	16294	16309						L2a1c2a	146	152	195	263	309C>TC	315iC
Prin33	16186	16189	16223	16229	16265	16278	16291	16294	16311				L2a2'3	152	182	263	315iC
Prin206	16114A	16213	16223	16278	16362								L2b1	150	152	182	195	198	204	263	315iC
Prin172	16069	16223	16264	16278									L2c2	93	146	150	152	182	195	198	263	309iC	315iC	325
Prin175	16223	16264	16278	16311									L2c2	93	146	150	152	182	183	195	198	263	315iC	325
Prin203	16223	16264	16278	16311									L2c2	93	146	150	152	182	183	195	198	263	309d	315iC	325
Prin73	16069	16223	16264	16278									L2c2	93	146	150	152	182	195	198	263	309iC	315iC	325
Prin165	16124	16223	16319										L3d1a	152	195	263	309iC	315iC
Prin18	16124	16223	16319										L3d1a	152	195	263	309iC	315iC
Prin191	16124	16223	16319										L3d1a	152	195	263	309iC	315iC
Prin30	16185	16223	16311	16327									L3e1a1	150	185	189	200	263	315iC
Prin76	16185	16209	16223	16327									L3e1a2	150	152	189	195	200	207	263	309iC	315iC
Prin80	16185	16209	16223	16327									L3e1a2	150	152	189	195	200	207	263	309iC	315iC
Prin89	16185	16209	16223	16327									L3e1a2	150	152	189	195	200	207	263	309iC	315iC
Prin108	16172	16223	16327										L3e1g	150	189	200	207	263	309iC	315iC
Prin97	16183C	16189	16223	16320									L3e2	150	195	263	309iC	315iC
Prin154	16172	16183C	16189	16223	16320								L3e2b	150	195	263	309iC	315iC
Prin198	16172	16189	16223	16260	16320								L3e2b	150	152	195	263	315iC
Prin17	16129	16209	16223	16292	16311								L3f1b	189	200	263	309iC	315iC
Prin197	16129	16145	16189	16209	16223	16292	16295	16311					L3f1b1a	185	189	200	263	309iCC	315iC
Prin100	16179	16183C	16189	16223	16239	16311	16320	16362					L4b1	150	185	188	199	204	263	309iC	315iC
Prin118	16179	16183C	16185	16189d	16213	16223	16239	16311	16320	16362			L4b1	150	199	204	263	309iC	315iC
Prin37	16172	16223	16241	16278									M51	146	150	152	182	195	263	309iCC	315iC	325
Prin171	16066	16182C	16183C	16189	16213	16223	16278						X2a	146	152	182	263	315iC
Note: Variant positions from the Cambridge Reference Sequence shown for amplified fragment between 16059-16383 positions of HVR-I and between 78-408 of HVR-II

## Sheet: Table S4
Table S4. Y-chromosome haplotypes and haplogroups in in the Principenses
Haplotype	N	DYS19	DYS385a/b	DYS389I	DYS389II*	DYS390	DYS391	DYS392	DYS393	DYS437	DYS438	DYS439	Haplogroup
H1	1	15	18-20	13	17	21	10	11	15	14	11	11	E1b1a
H2	1	15	17-18	12	17	21	10	11	13	14	11	12	E1b1a
H3	1	15	17-18	13	17	21	10	11	13	14	11	12	E1b1a
H4	1	15	16-17	13	17	21	10	11	13	14	11	12	E1b1a
H5	1	17	17-19	14	17	21	10	11	15	14	11	12	E1b1a
H6	2	15	17-17	13	17	21	11	11	13	14	11	11	E1b1a
H7	1	15	17-17	13	18	21	11	11	13	14	11	12	E1b1a
H8	1	15	15-16	13	17	21	10	11	14	14	11	12	E1b1a
H9	1	17	18-18	13	17	21	10	11	14	14	11	12	E1b1a
H10	1	17	17-18	13	18	21	10	11	13	13	11	12	E1b1a
H11	1	16	16-17	13	18	21	10	11	13	14	11	11	E1b1a
H12	1	15	17-17	13	17	21	10	11	13	14	10	11	E1b1a
H13	1	17	18-18	13	18	21	10	11	15	14	10	11	E1b1a
H14	1	15	17-18	13	18	21	10	11	14	14	11	13	E1b1a
H15	1	16	17-18	13	17	21	11	11	14	14	11	11	E1b1a
H16	1	17	18-18	13	17	21	11	11	15	13	10	12	E1b1a
H17	1	15	14-16	12	18	22	10	11	13	17	10	12	G2a
H18	1	13	12-15	13	17	22	8	11	13	14	10	14	**
*The size of DYS389II alleles was obtained by subtracting the size of DYS389I alleles to the size of the DYS389II PCR fragments.
**The haplogroup could not be inferred with sufficient confidence (posterior probability < 95%).

## Sheet: Table S5
Table S5. mtDNA HVRI and HVRII haplotype and sequence diversity measures. For comparison values from HVRI from São Tomé (Coelho et al., 2008) are included.
mtDNA region	Population	N	K (K/N)	H (SD)	S (S/L)	θ k (95%CI)	θ hom (SD)	θ s (SD)	θ π (SD)	Reference
HVRI (16059- 16383)	Príncipe	41	27 (0.66)	0.98 (0.01)	47 (0.14)	33.29 (18.02-62.50)	38.19 (17.96)	10.99 (3.49)	8.82 (4.61)	This study
	Angolar	42	16 (0.38)	0.91 (0.02)	33 (0.10)	8.96 (4.75-16.59)	8.83 (2.48)	7.67 (2.52)	7.76 (4.09)	Coelho et al. (2008)
	Non-Angolar	40	30 (0.75)	0.99 (0.01)	45 (0.14)	52.86 (27.44-105.35)	62.12 (38.21)	10.58 (3.39)	7.89 (4.16)	Coelho et al. (2008)
HVRII (78-408)	Príncipe	41	26 (0.63)	0.97(0.01)	26 (0.08)	29.52 (16.06-54.97)	36.25 (16.18)	5.61 (1.94)	7.29 (3.87)	Coelho et al. (2008)
N = sample size, K = number of different haplotypes, H = haplotype diversity, S = number of polymorphic sites, L= sequence length (HVRI:325 bp, HVRII:331), θ = mutation drift statistics calculated from K (θk) , 1-H (θ hom), S (θs), and the mean number of pairwise differences (θ π).

## Sheet: Table S6
Table S6. Y-chromosome STR haplotype diversity measures in Príncipe. For comparison values from São Tomé(Coelho et al., 2008) are included.
Population	N	K (K/N)	H (SD)	θ k (95%CI)	θ hom (SD)	Average locus diversity (SD)	Reference
Príncipe	19	17 (0.895)	0.988 (0.021)	73.39 (23.99-249.99)	82.59 (153.24)	0.397 (0.232)	This study
Angolar	25	10 (0.40)	0.600 (0.116)	5.68 (2.56–12.26)	1.13 (0.56)	0.218 (0.139)	Coelho et al. (2008)
Non-Angolar	22	18 (0.82)	0.978 (0.021)	43.88 (17.65–117.36)	43.37 (45.29)	0.526 (0.295)	Coelho et al. (2008)
N = sample size, K = number of different haplotypes, H = haplotype diversity. The DYS385 locus was not included in this analysis

## Sheet: Table S7
Table S7. Haplotype sharing between the most frequent Y-chromosome haplotype in the Angolares and Y-chromosomes from African populations available in the Y-STR Haplotype Reference Database (YHRD)
	Number of exact matches	Sample size
Angola	7	309
Benin	1	234
Cameroon	0	338
Cape Verde	0	117
Central African Republic	0	33
Ghana	1	1003
Guinea-Bissau	0	86
Kenya	0	272
Mozambique	1	78
Namibia	3	81
Nigeria	0	497
Ruanda	0	124
South Africa	2	758
Zimbabwe	3	216
Total	18	4146
